# Supplementary material for: Water-stable halide coordination polymers with dual self-trapped exciton emissions for dual-mode Hg2+sensing
Source: Royal Society of Chemistry journal article supplement (doi:10.1039/d2qi02766f), 2023-01-01
Supplement: d2qi02766f1.pdf [file d2qi02766f1.pdf]

Supporting Information

**Water-stable halide coordination polymer with dual self-trapped  
exciton emission for dual-mode Hg<sup>2+</sup> sensing**

Yin-Jing Shi,<sup>‡</sup> Xianghua Yang,<sup>‡</sup> Hou-Rong He, Wei-Ming Liao,\* Hua-Qun Zhou,  
Lai-Hon Chung, Lin Yu and Jun He\*

## Experimental Section

### DFT calculation

All calculations were performed with periodic DFT using the Gaussian plane wave method implemented in CP2K's Quickstep module.<sup>1,2</sup> The explorative studies of the catalysts structure were performed using the molecularly optimized basis set DZVP-MOLOPT-SR-GTH for each atom with a Goedecker-Teter-Hutter (GTH) pseudopotential.<sup>3-6</sup> The calculations were conducted using the generalized gradient approximation and the Perdew-Burke-Ernzerhof (PBE) functional<sup>7</sup> for DOS and Band Structure. A 2D **XCP-1** was employed and  $2 \times 2 \times 1$  supercell with 572 atoms model was employed to calculate DOS and Band Structure. The k-path of Band Structure was generated by SeeK-path,<sup>8</sup> insert 10 point in every path. An energy convergence for the self-consistent field (SCF) calculation was set to  $2 \times 10^{-6}$  Hartree. The energy cutoff of 400 Ry was used throughout the calculations.

The excited state structure was optimized by TDDFPT with Auxiliary Density Matrix Method (ADMM) approximated PBE functional and semiempirical Simplified Tamm-Dancoff Approximation (sTDA) in the CP2K program package.<sup>9-11</sup> The ADMM basis cFIT3 has been used for C, H, O, S element and admm-dzp has been used for Pb and I. The Convergence criterion of all excitation energies was set as  $1 \times 10^{-7}$  eV.

All the input file was generated by Multiwfn.<sup>12</sup> The structure and VBM/CBM pictures were generated by VESTA.<sup>13</sup>

## Supporting figures and tables

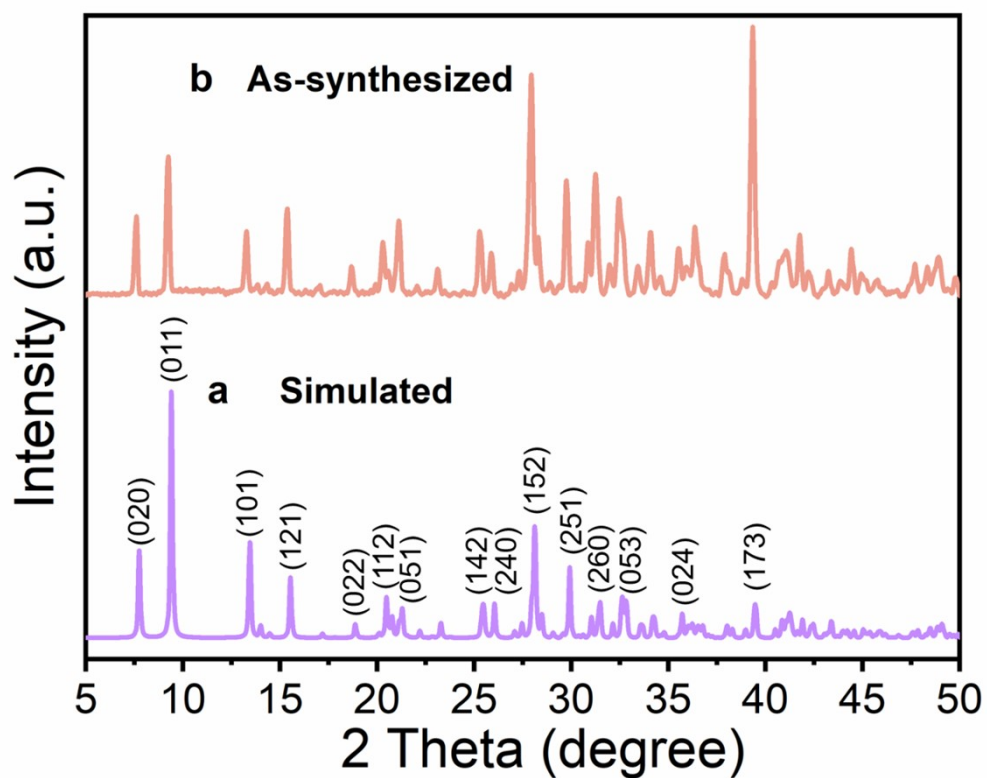

Figure S1. PXRD patterns of (a) simulated and (b) as-synthesized XCP-1.

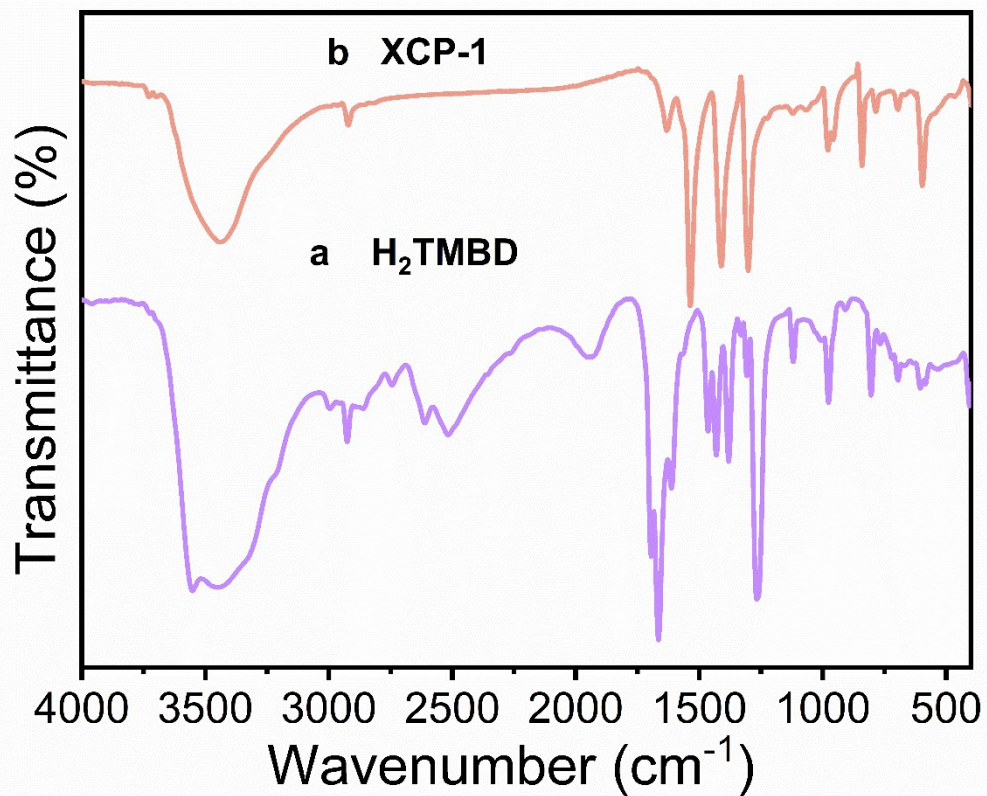

Figure S2. FT-IR spectra of (a) the ligand H<sub>2</sub>TMBD and (b) as-synthesized XCP-1.

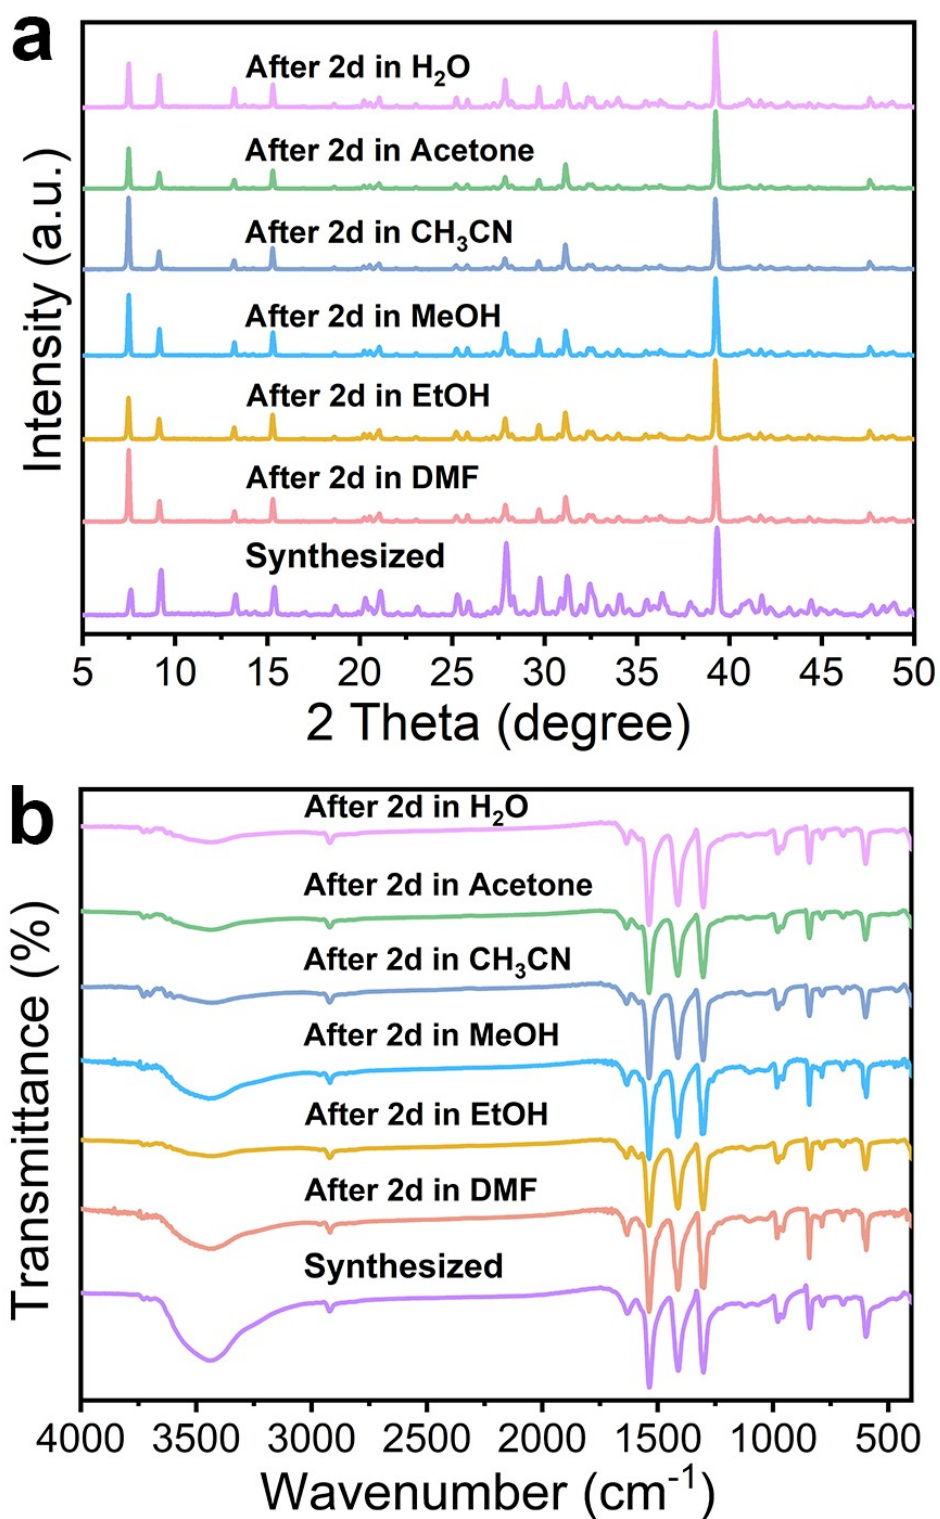

**Figure S3.** (a) PXRD patterns and (b) FT-IR spectra of XCP-1 before and after treatment in different solvents for 48 h.

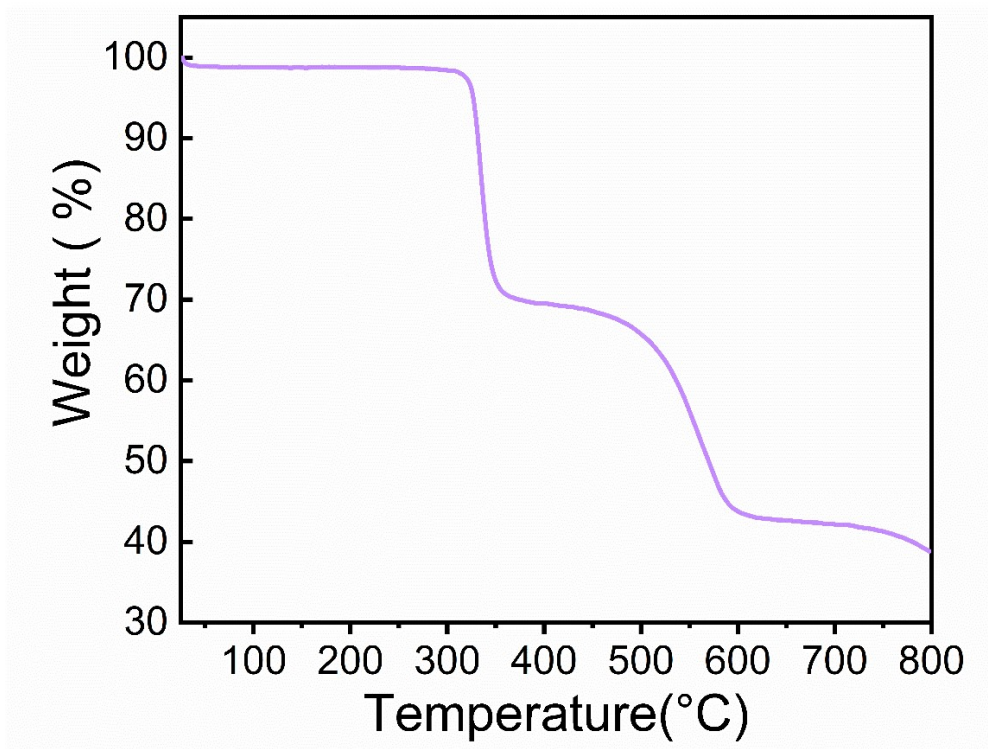

**Figure S4.** Thermogravimetric curve of XCP-1 under N<sub>2</sub> atmosphere.

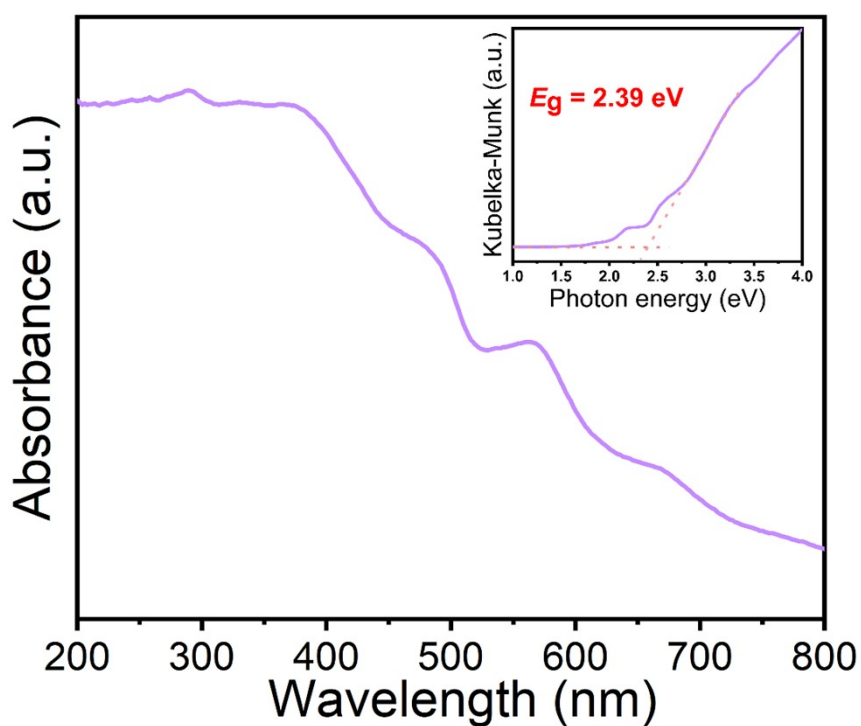

**Figure S5.** Absorption spectrum of XCP-1 by UV-vis diffuse reflectance measurement.

Inset: Kubelka-Munk plot transformed from diffuse reflectance data.

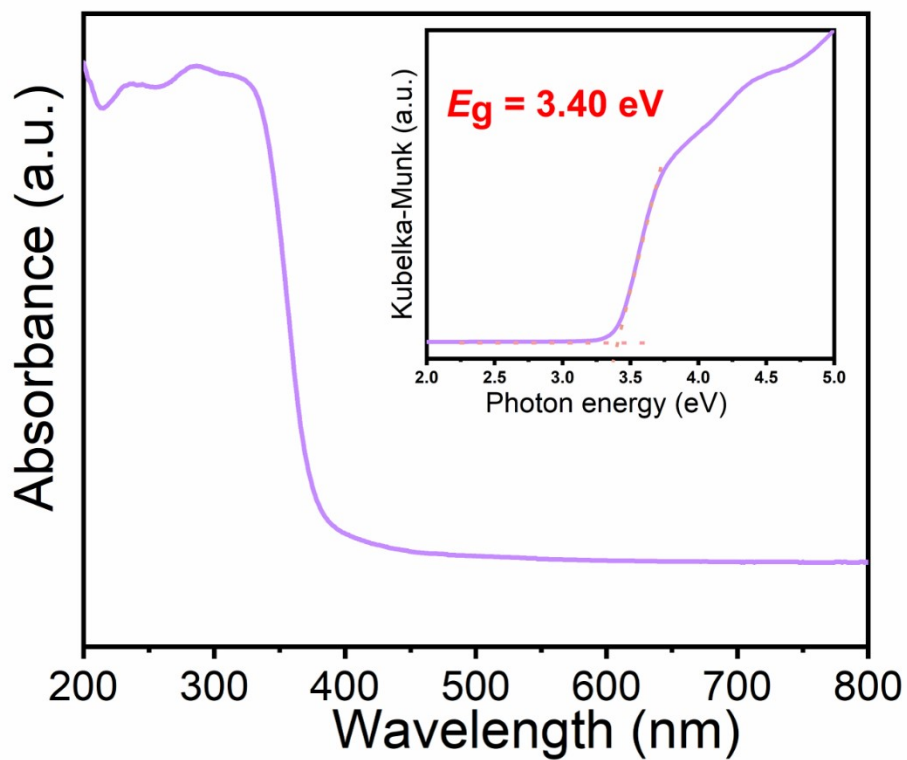

**Figure S6.** Absorption spectrum of H<sub>2</sub>TMBD by UV-vis diffuse reflectance measurement. Inset: Kubelka–Munk plot transformed from diffuse reflectance data.

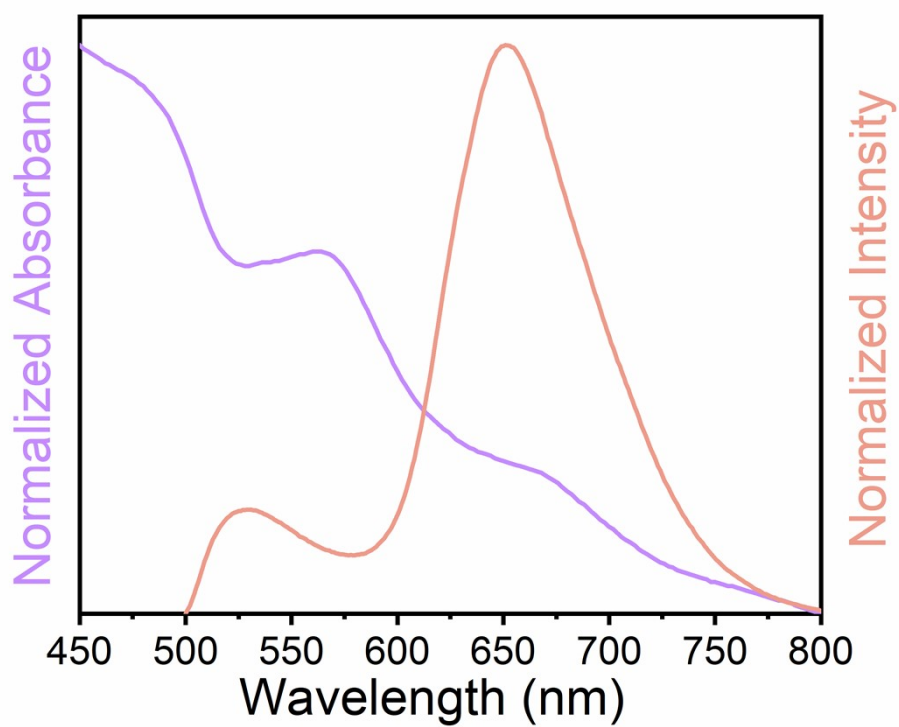

**Figure S7.** The absorption and emission ( $\lambda_{\text{ex}} = 450 \text{ nm}$ ) spectra of XCP-1.



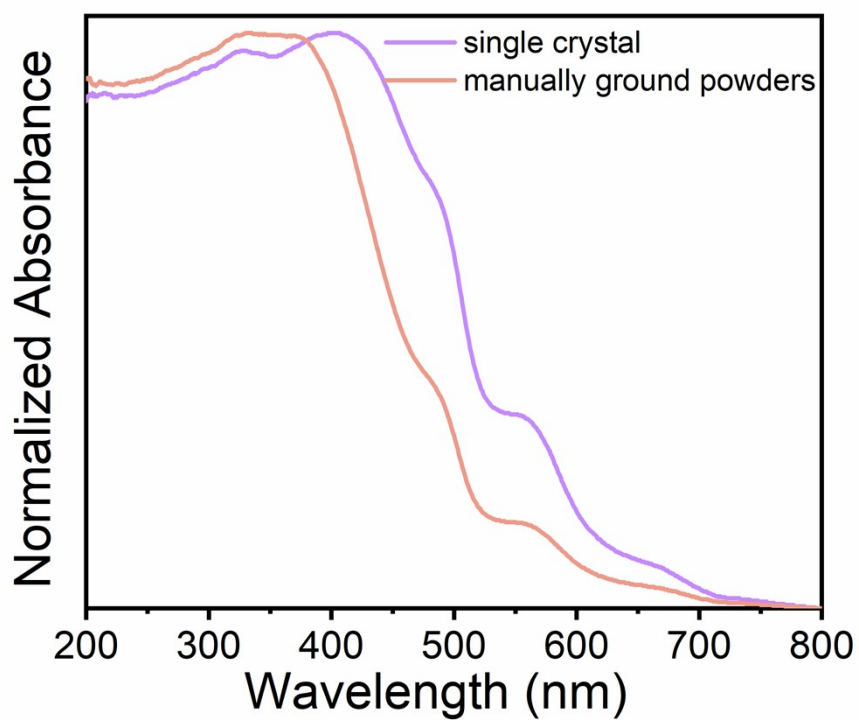

**Figure S8.** UV-vis absorption spectra of XCP-1 in single-crystal state and manually ground powders.

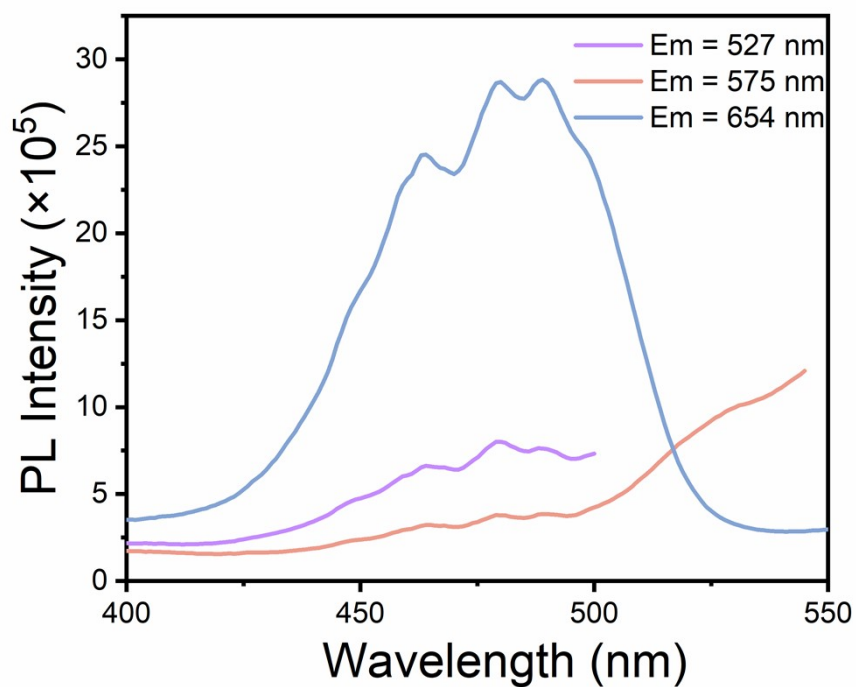

**Figure S9.** Excitation spectra of XCP-1 when monitored by 527, 575 and 654 nm.

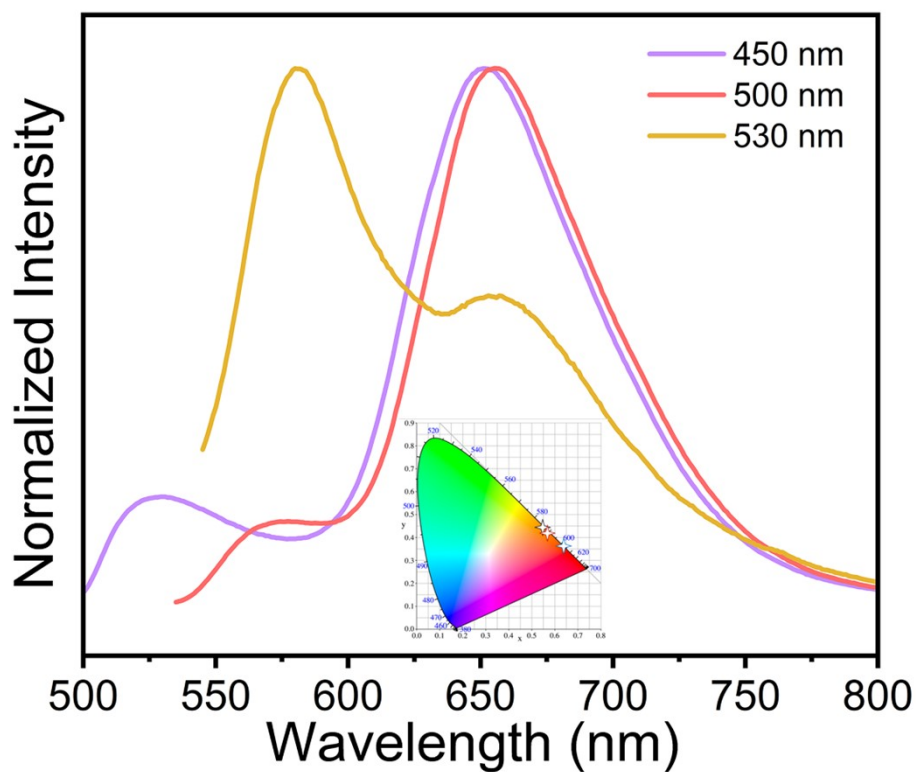

**Figure S10.** Photoluminescent spectra and CIE coordinate diagrams of XCP-1 under excitation at 450, 500, and 530 nm, respectively.

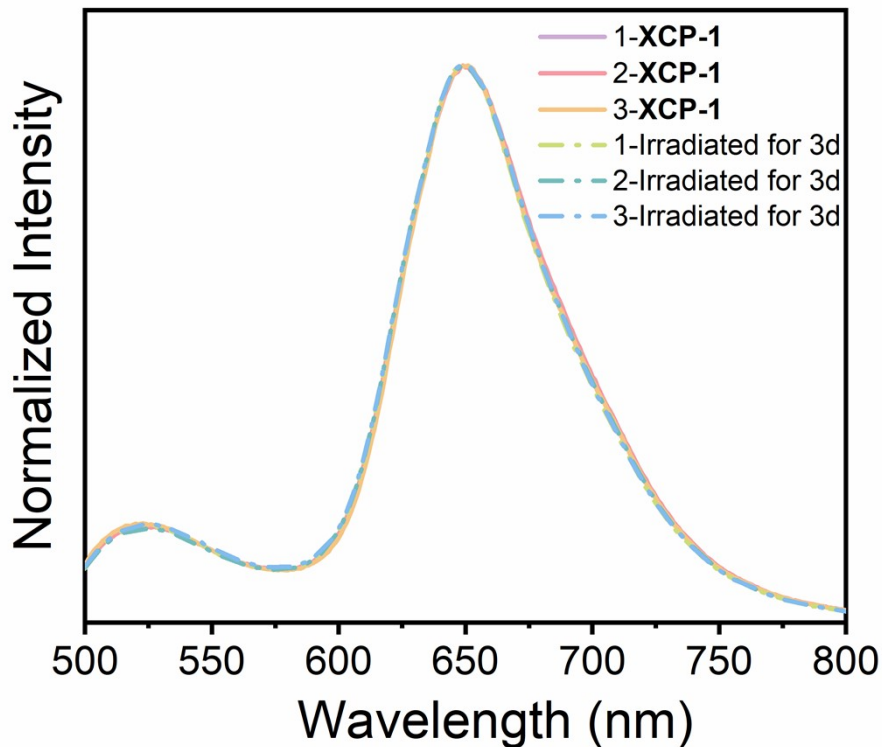

**Figure S11.** Emission spectra of three sample of XCP-1 measured after irradiation for 3d.



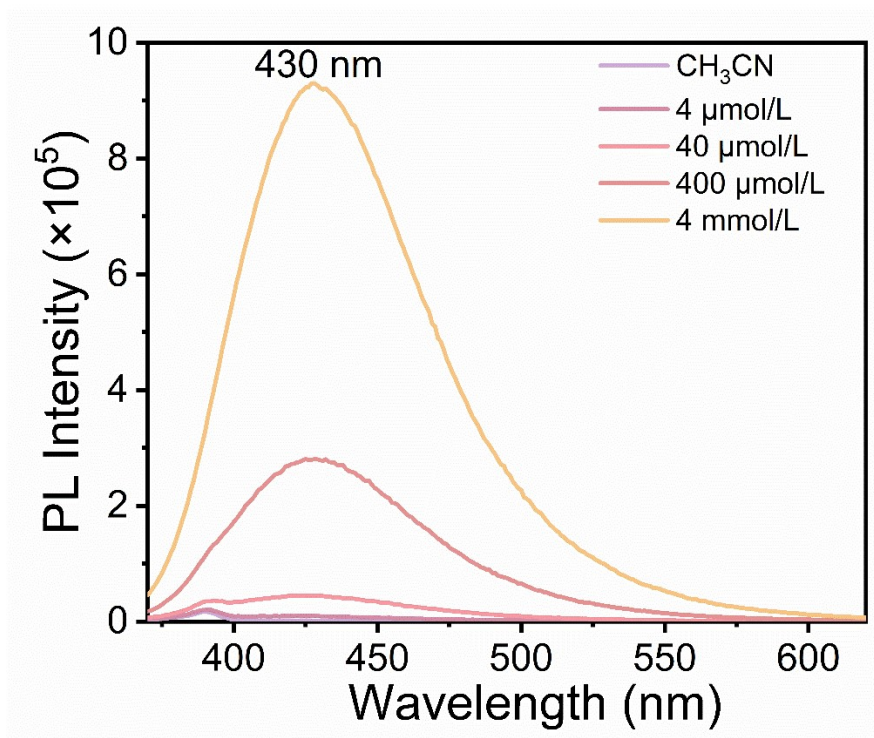

**Figure S12.** The emission spectra of H<sub>2</sub>TMBD at different concentrations when excited at 350 nm.

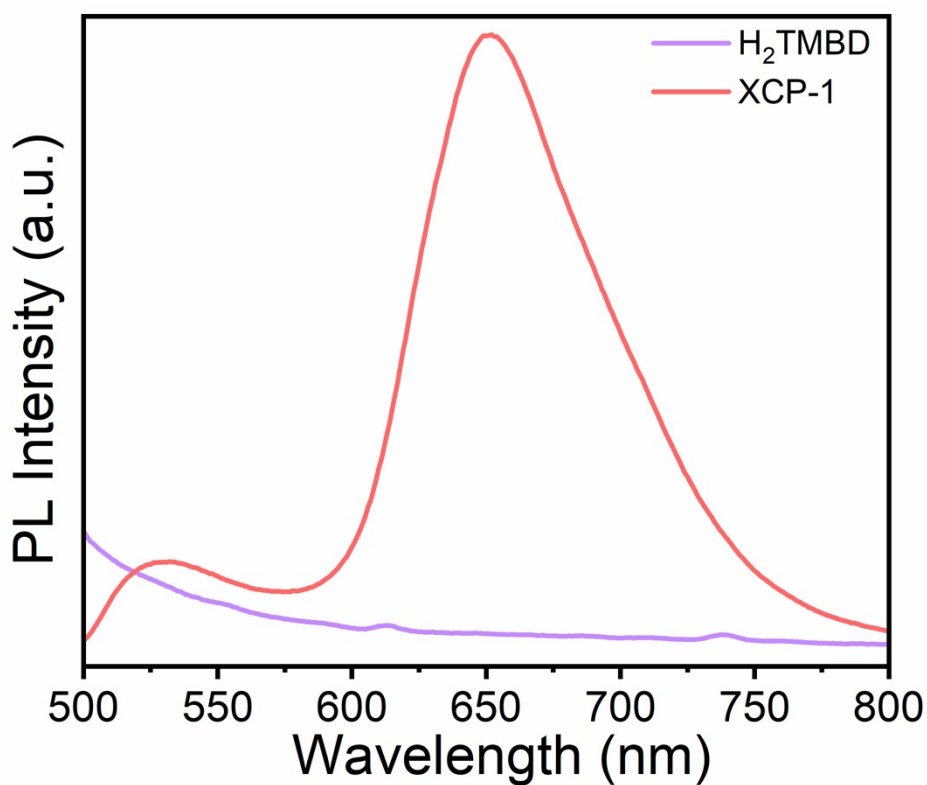

**Figure S13.** The emission spectra of XCP-1 and ligand H<sub>2</sub>TMBD when excited at 450 nm.

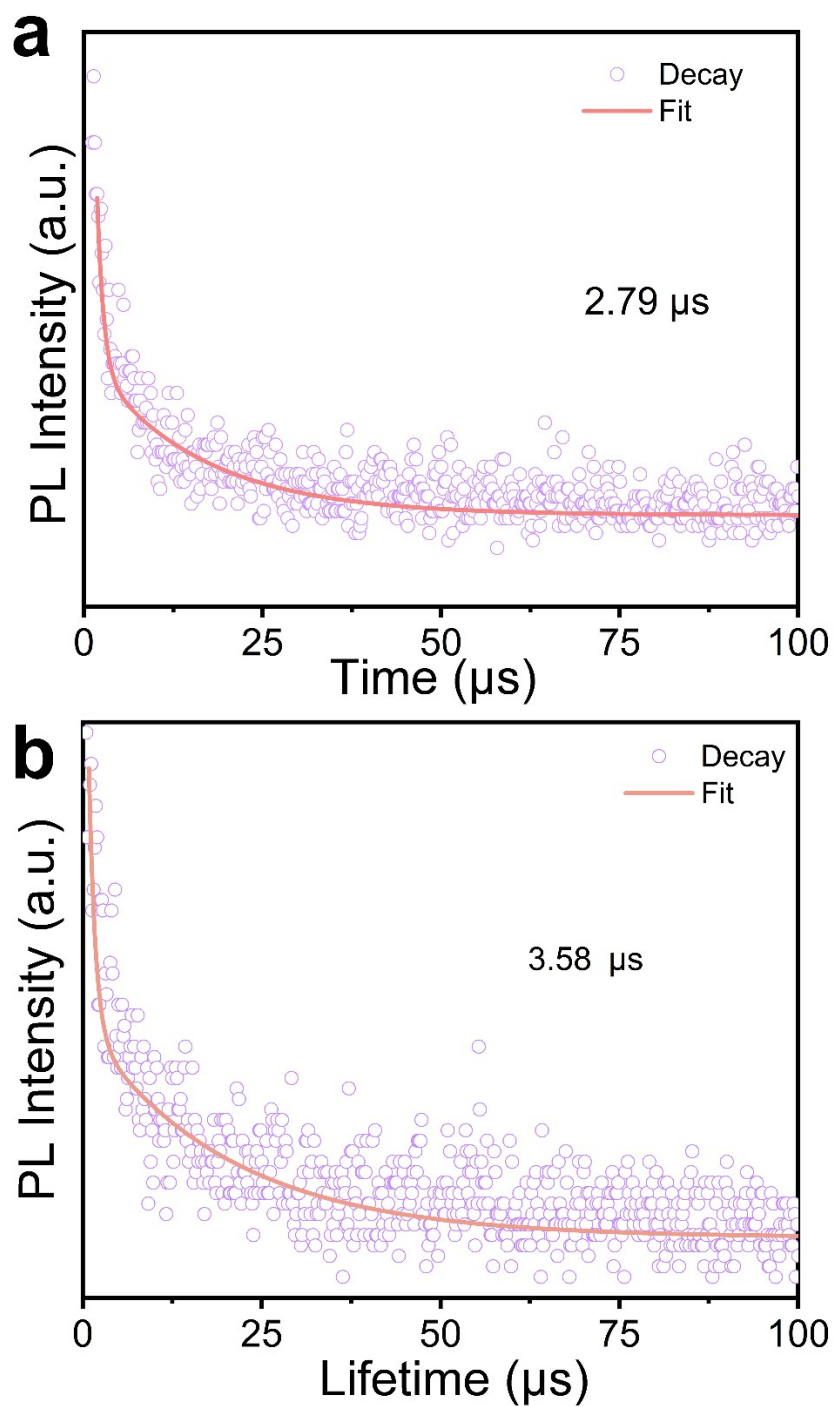

**Figure S14.** Photoluminescent decay curve and fitting plot of XCP-1 for the emission peak at 527 nm at (a) 300 K and (b) 78 K, respectively when excited at 450 nm.

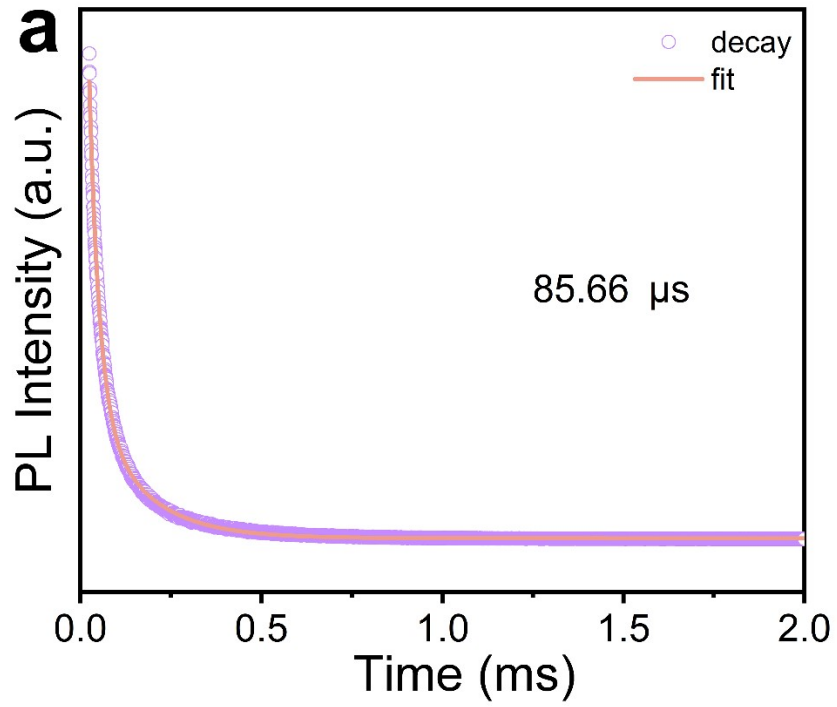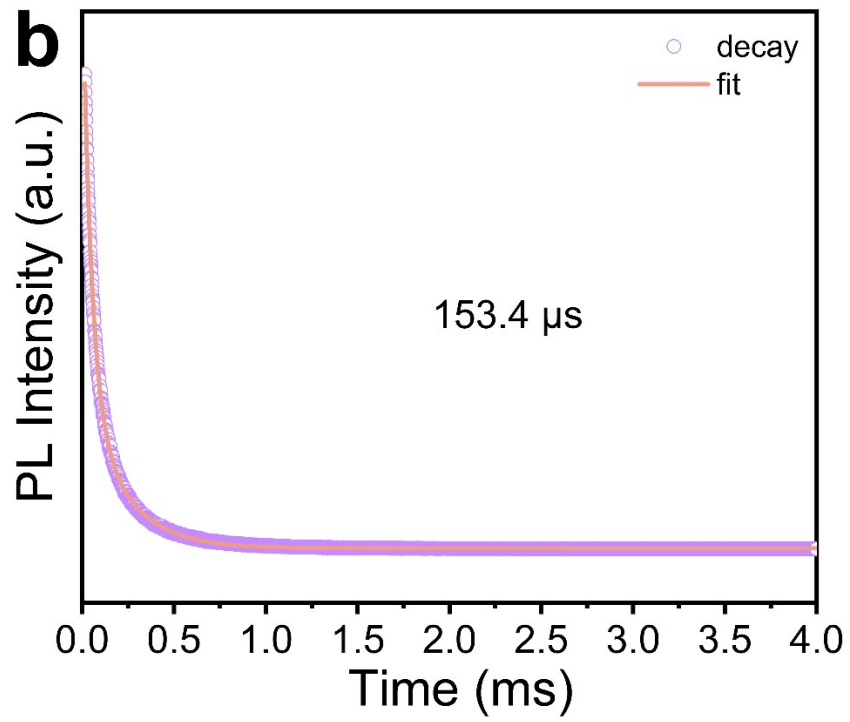

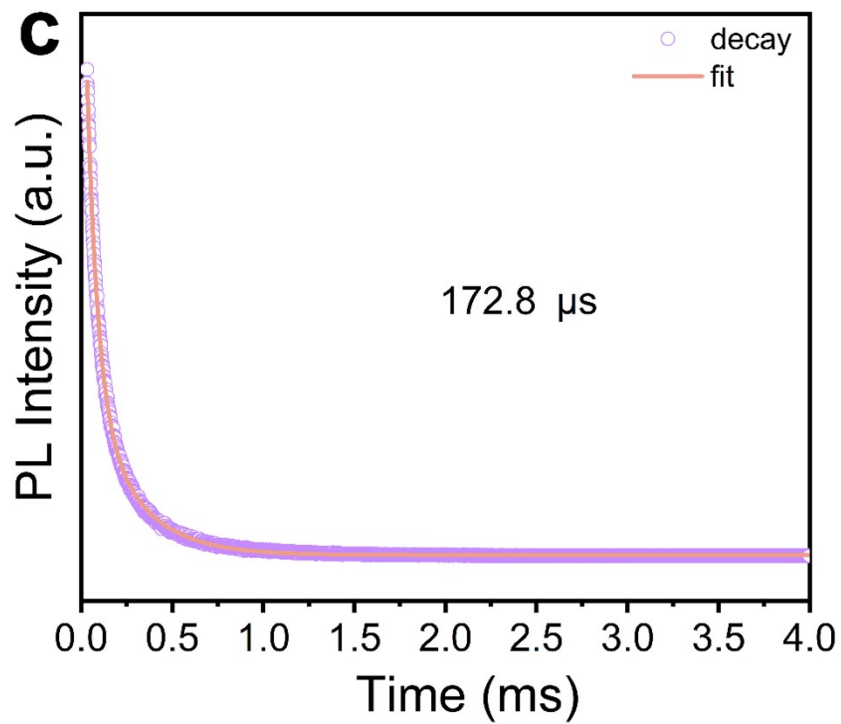

**Figure S15.** Photoluminescent decay curve and fitting plot of XCP-1 for the emission peak at 654 nm at (a) 300 K, (b) 200 K and (c) 78 K, respectively when excited at 450 nm.

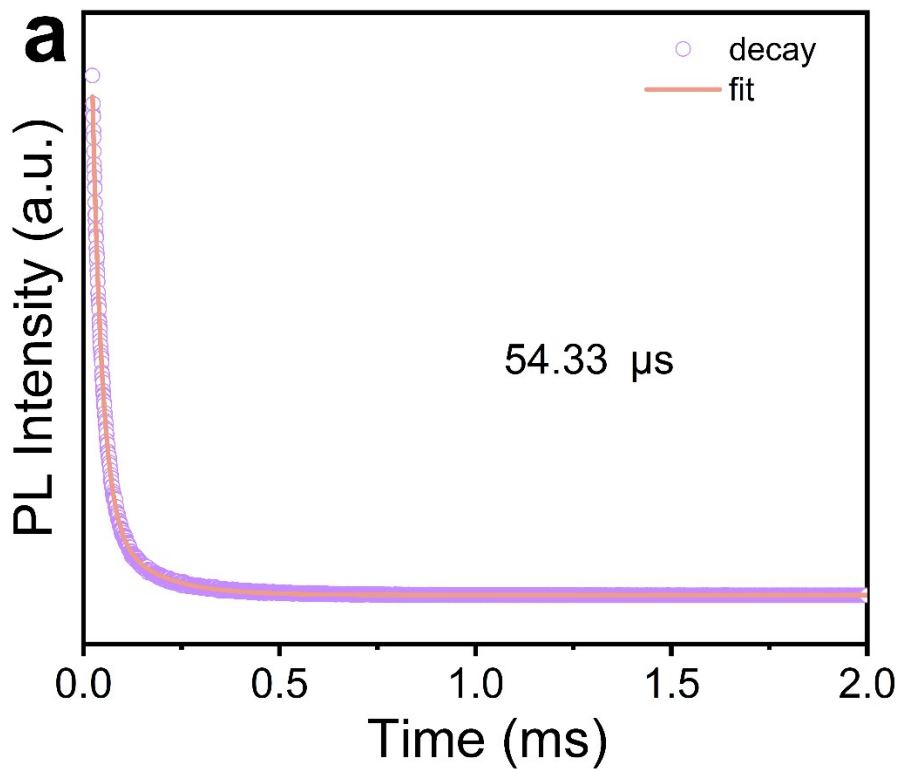

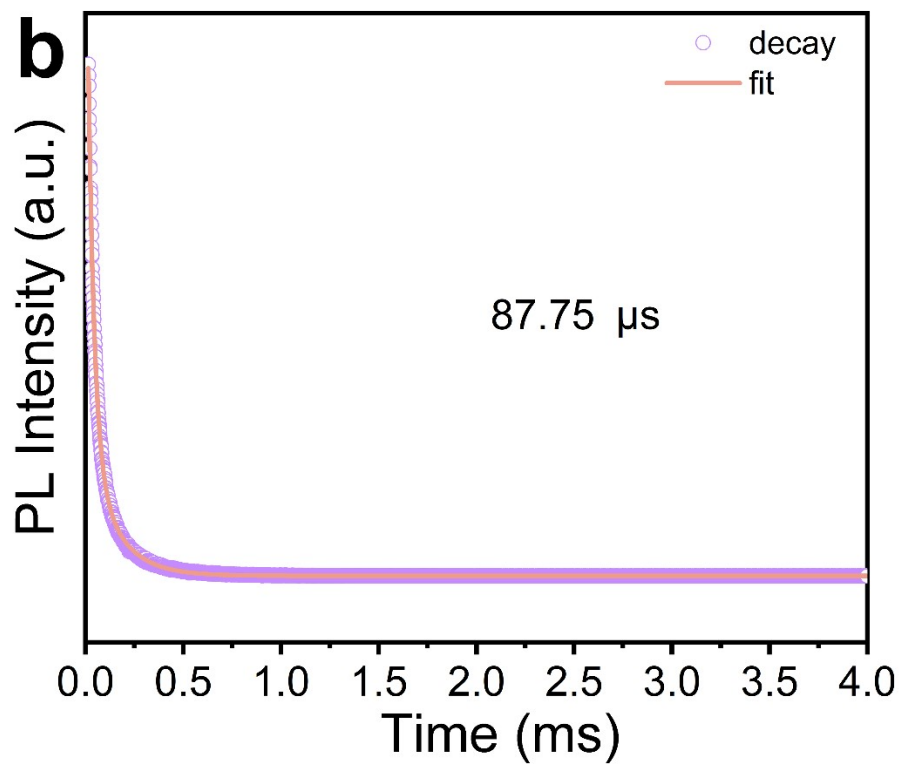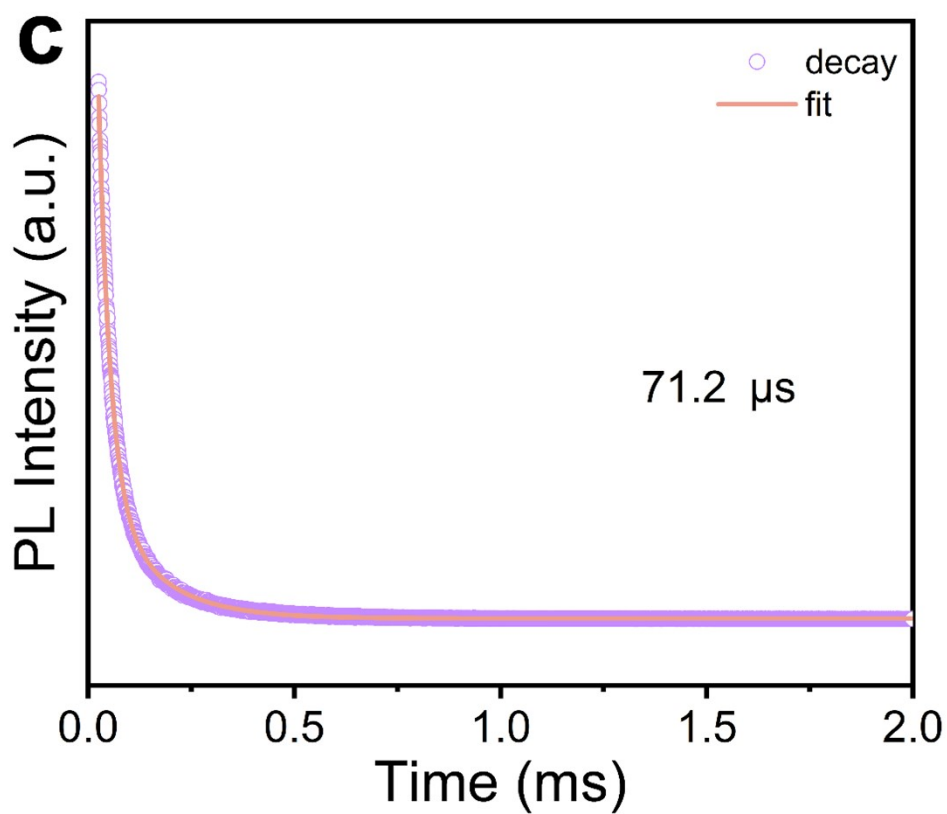

**Figure S16.** Photoluminescent decay curve and fitting plot of XCP-1 for the emission peak at 654 nm at (a) 78 K, (b) 200 K and (c) 300 K, respectively when excited at 510 nm.

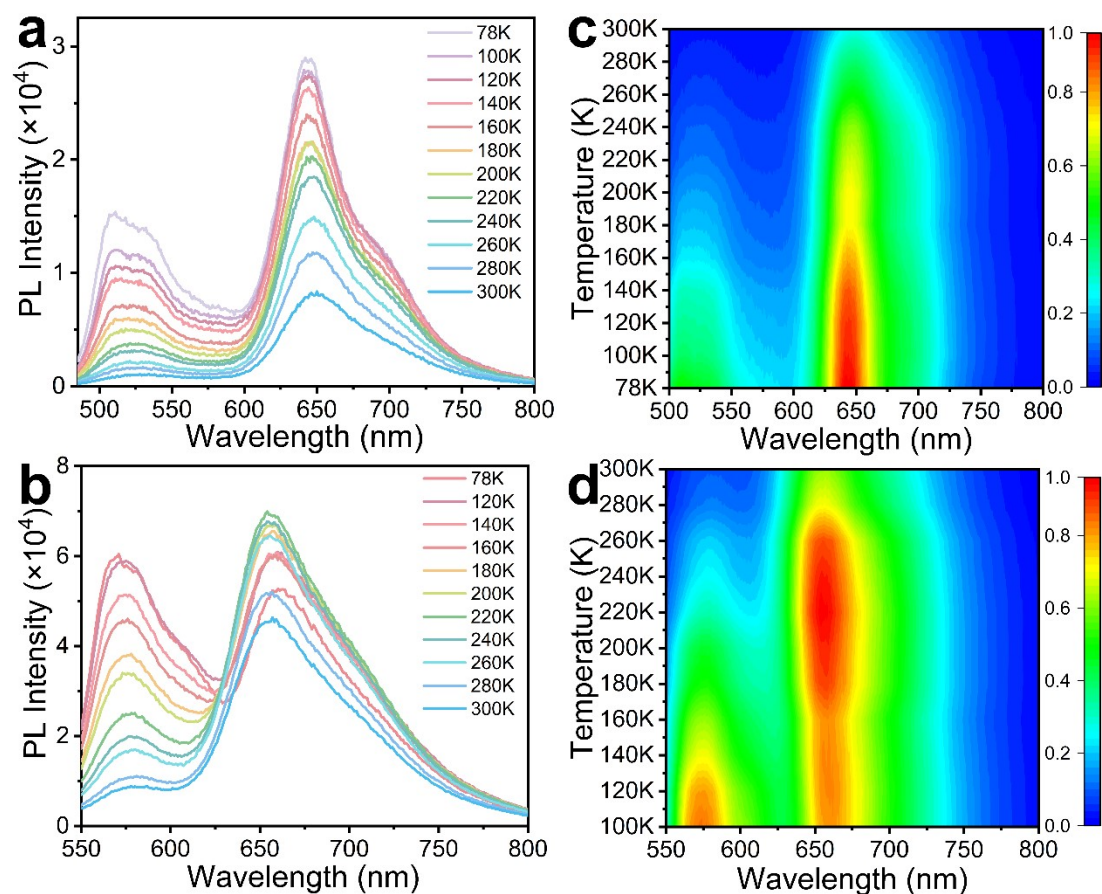

**Figure S17.** (a, b) Temperature-dependent emission spectra and (c, d) photoluminescent correlation maps of **XCP-1** with excitation wavelength at (a, c) 450 and (b, d) 510 nm, respectively.

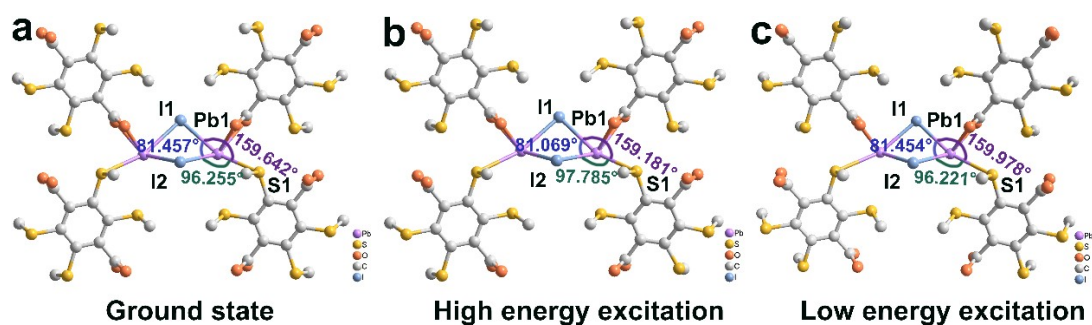

**Figure S18.** Deformed structures of ground state and excited states of **XCP-1** upon different excitation energy calculating from DFT method.



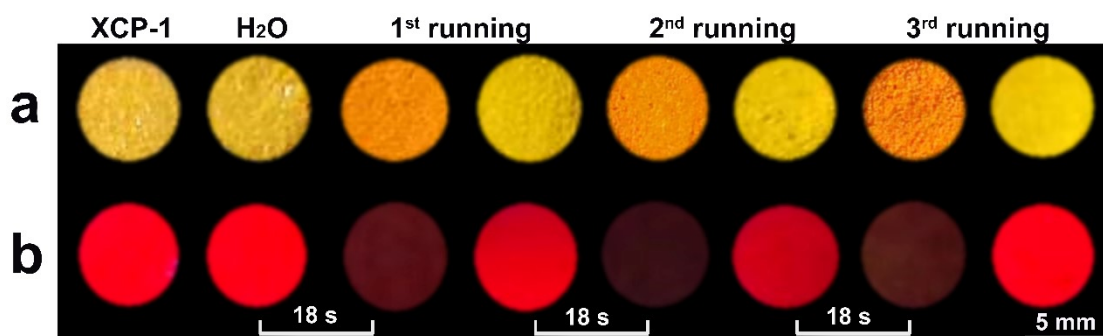

**Figure S19.** The photographs under (a) ambient light and (b) UV 360 nm of XCP-1 obtained from the cycling experiments of immersion in 700 ppm Hg<sup>2+</sup> solution for 18 s or successively washing with ethanol.

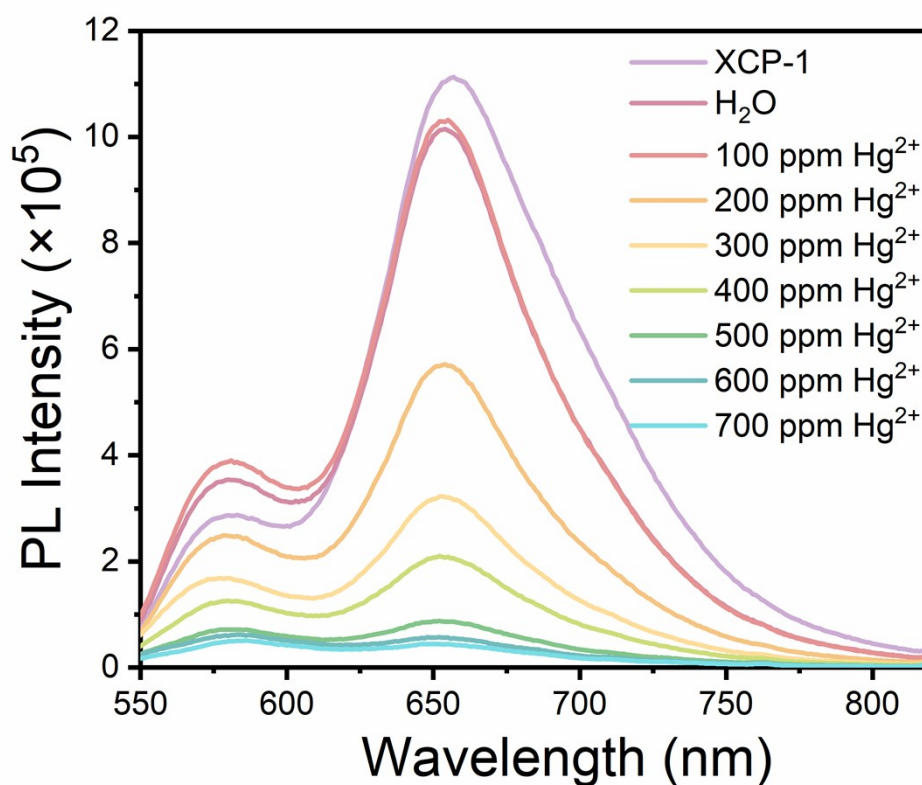

**Figure S20.** Photoluminescent spectra of XCP-1 after immersion in Hg<sup>2+</sup> solutions with different concentrations when excited at 510 nm.

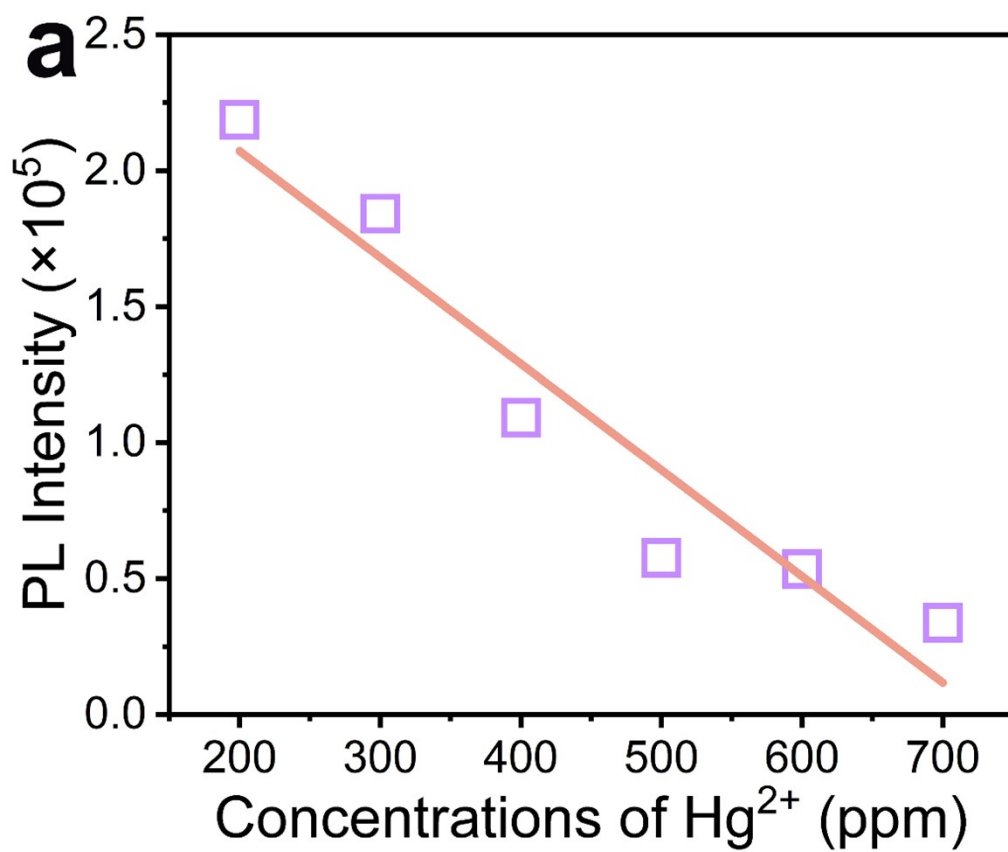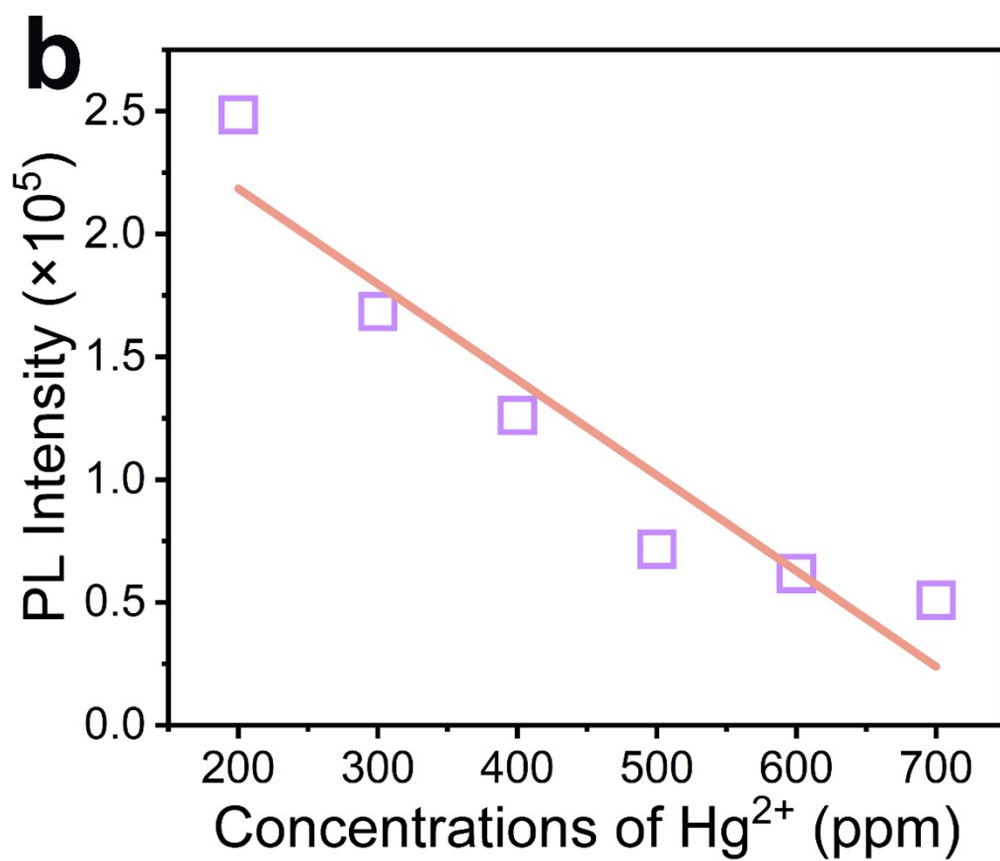

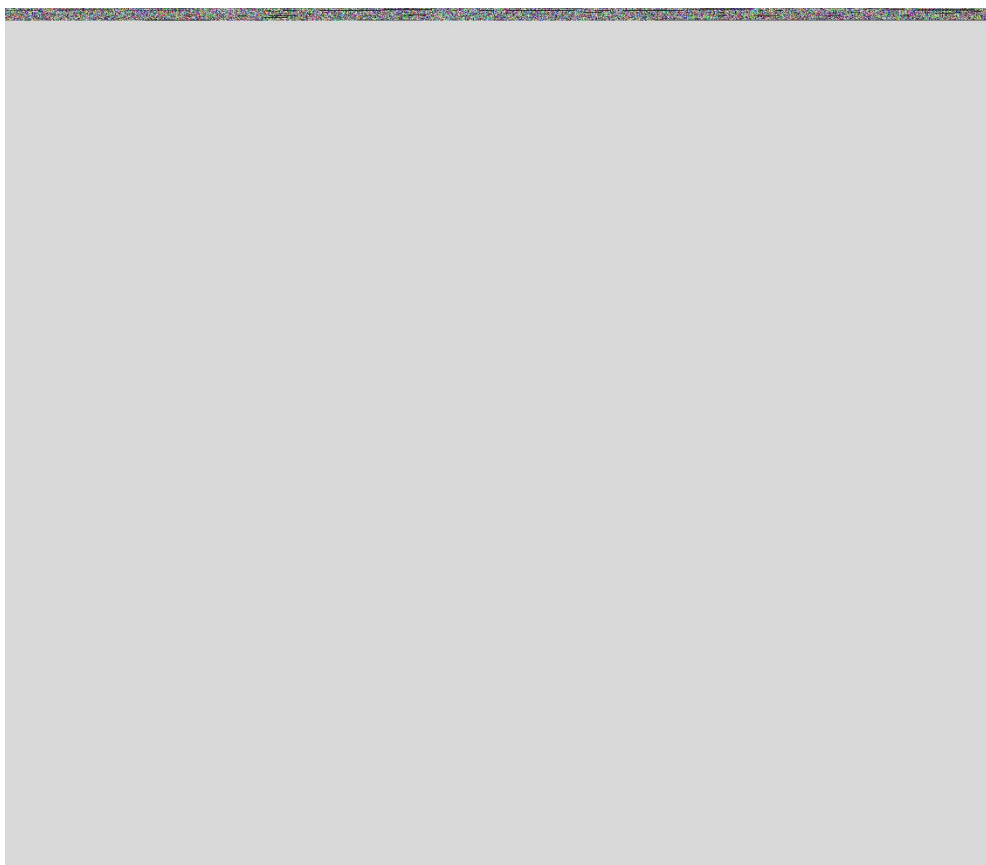

**Figure S21.** Plots of photoluminescence intensity vs.  $\text{Hg}^{2+}$  concentrations varying from 200 to 700 ppm. (a) Emission intensity at 527 nm when excited at 450 nm (correlation coefficient: 0.920), (b) Emission intensity at 575 nm when excited at 510 nm (correlation coefficient: 0.902), and (c) Emission intensity at 654 nm when excited at 510 nm (correlation coefficient: 0.864).

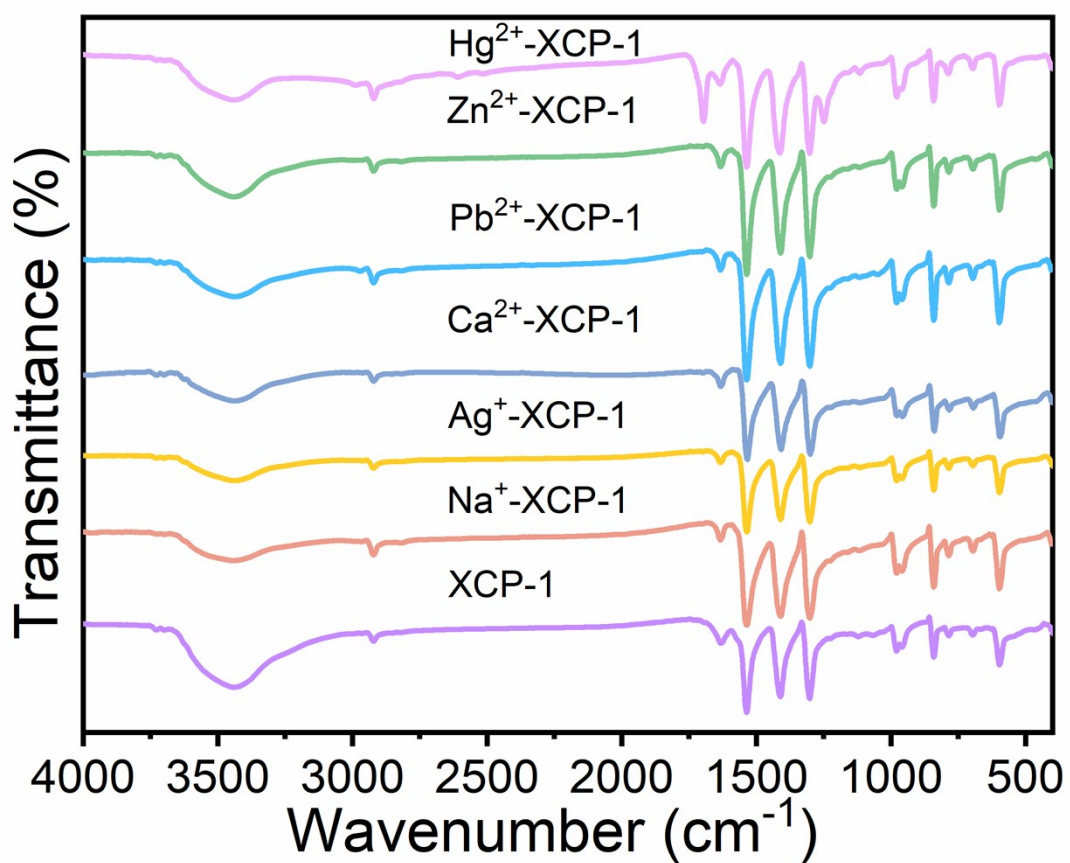

**Figure S22.** The FT-IR spectra of XCP-1 after immersion in different metal ion solutions.

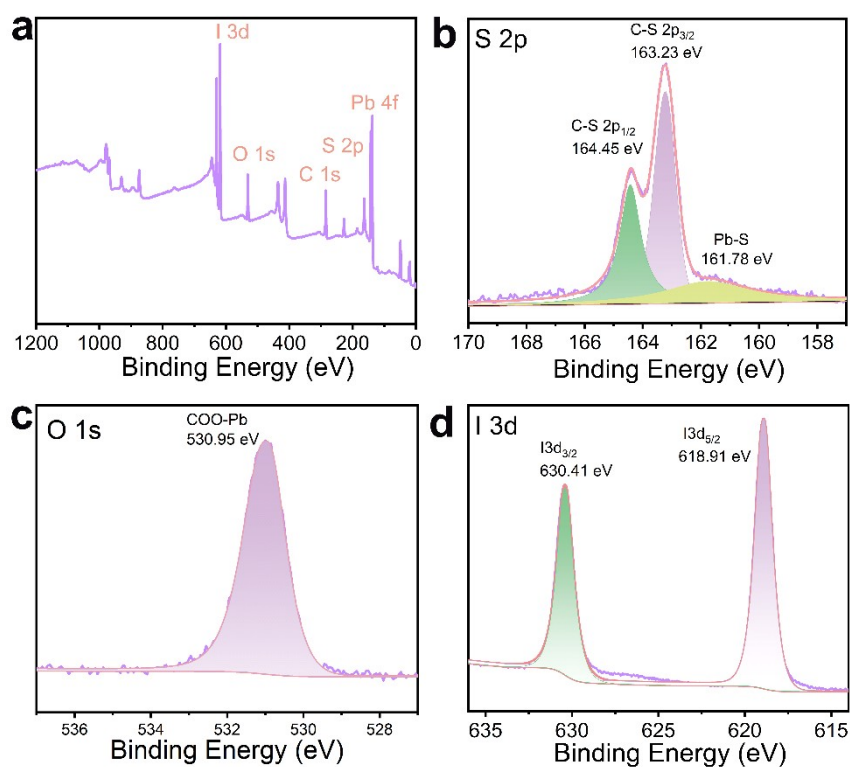

**Figure S23.** (a) XPS spectra of XCP-1. High-resolution (b) S 2p, (c) O 1s, and (d) I 3d spectrum.

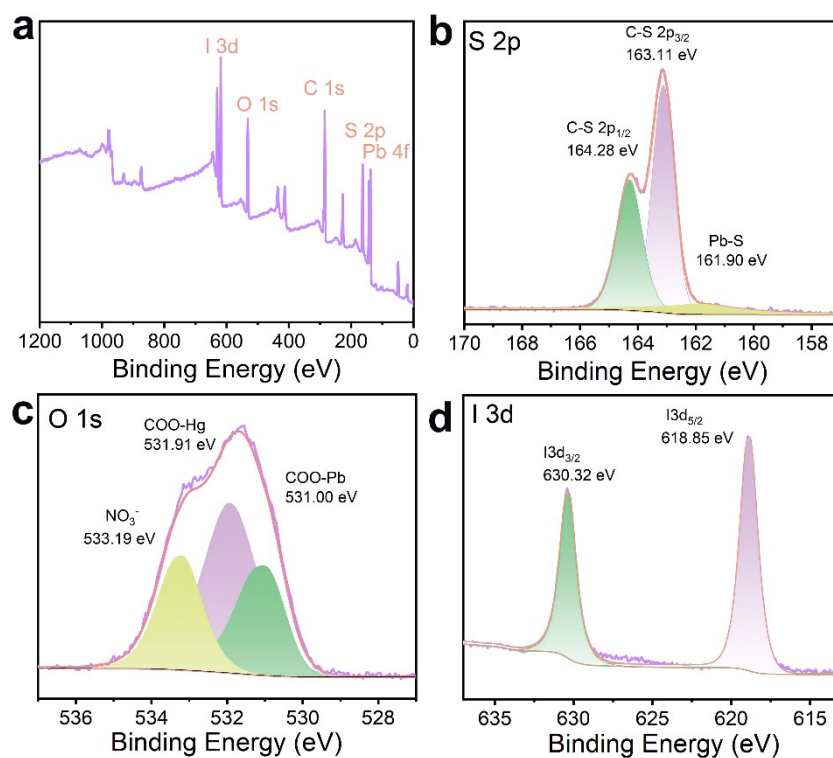

**Figure S24.** (a) XPS spectra of XCP-1 after treatment in 700 ppm  $\text{Hg}^{2+}$  solution. High-

resolution (b) S 2p, (c) O 1s, and (d) I 3d spectrum.

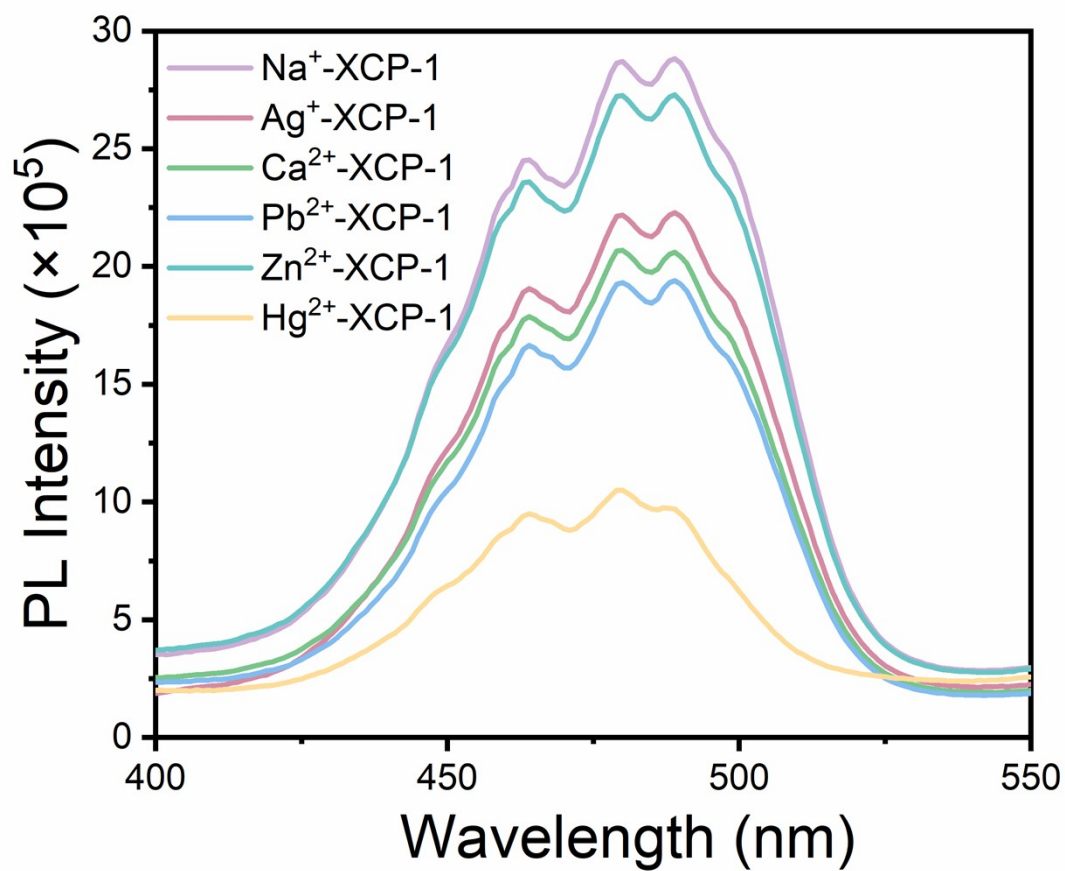

**Figure S25.** The excitation spectra of XCP-1 after immersion in different metal ion solutions.



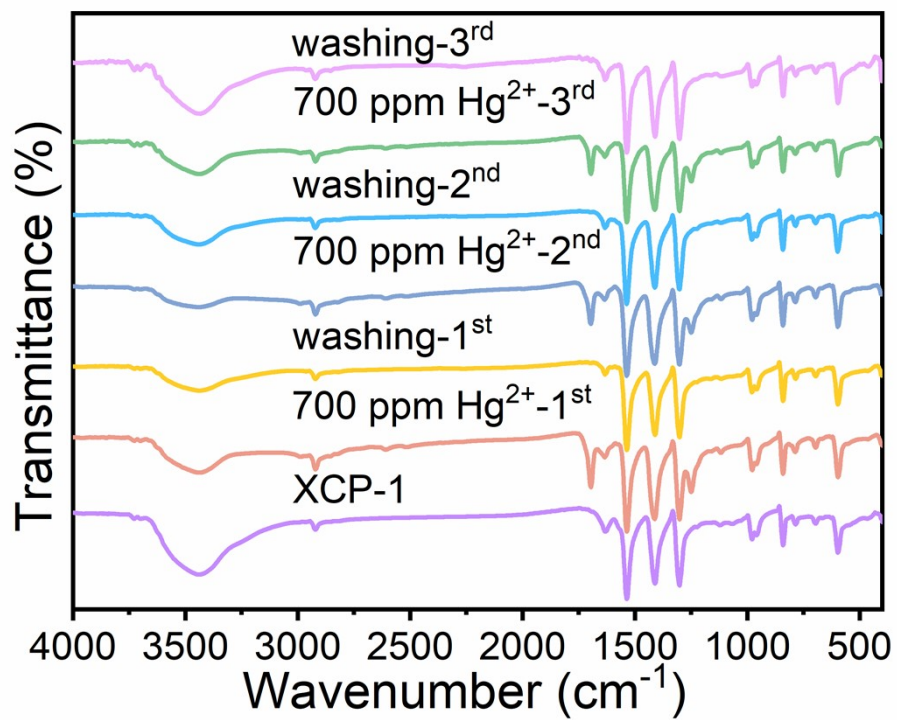

**Figure S26.** FT-IR spectra of XCP-1 obtained from the cycling experiments of immersion in 700 ppm Hg<sup>2+</sup> solution for 18 s or successively washing with ethanol.

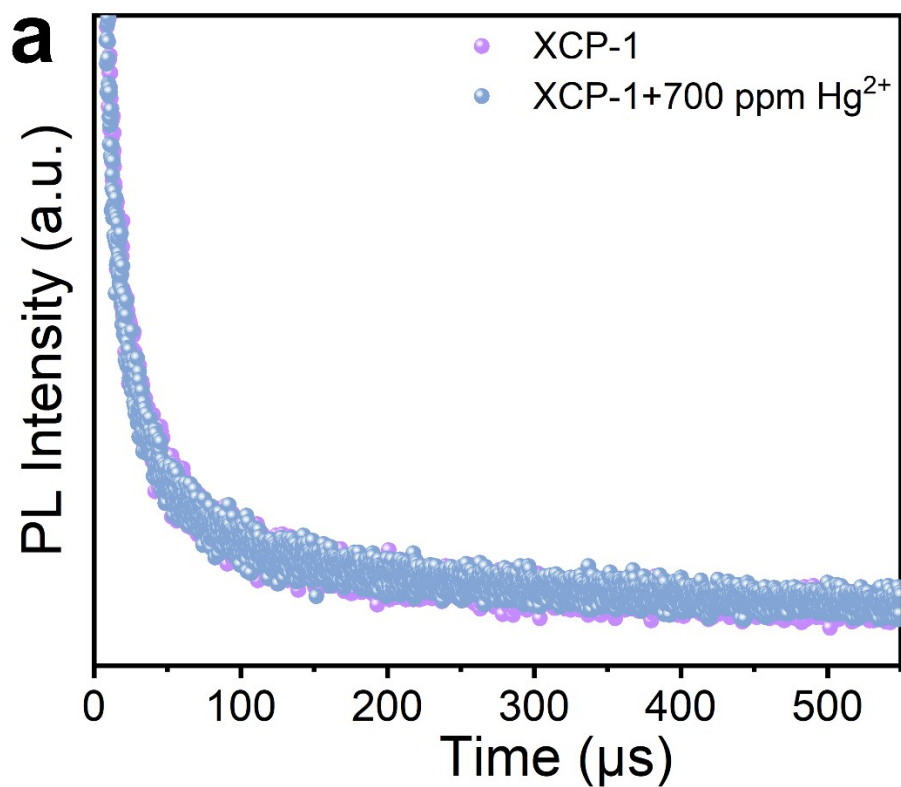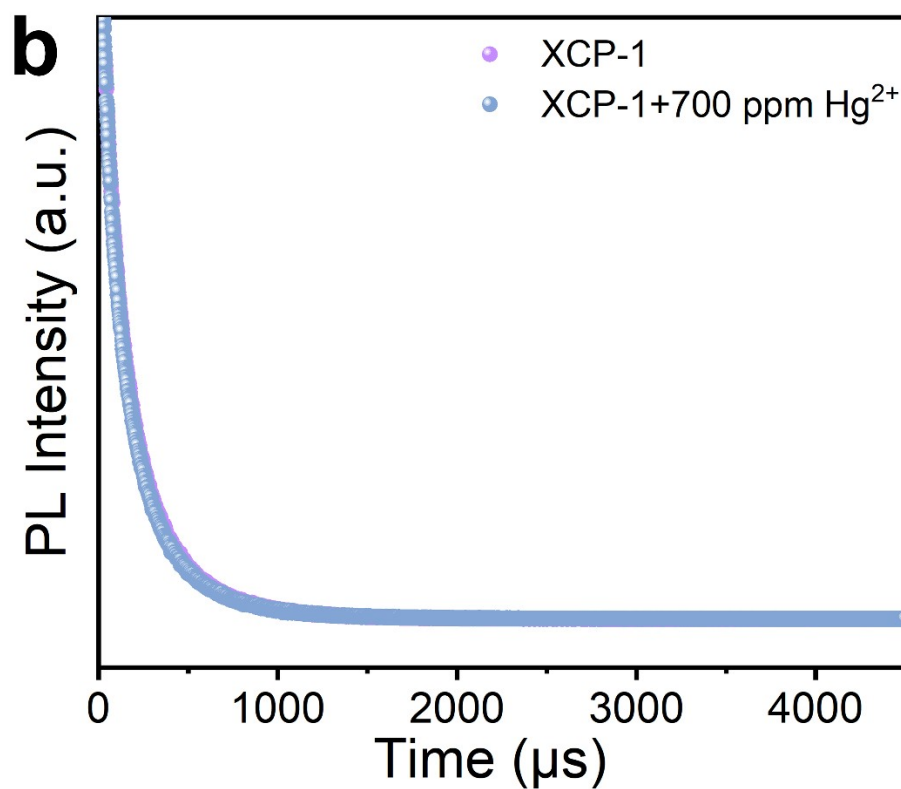

**Figure S27.** Photoluminescent decay curve of XCP-1 and XCP-1+700 ppm  $\text{Hg}^{2+}$  for the emission peak at (a) 527 nm and (b) 654 nm, respectively when excited at 359 nm.

**Table S1.** Crystallographic data and structure refinement result for **XCP-1**.

| <b>Compound</b>                                    | <b>XCP-1</b>                                                                                                                              |
|----------------------------------------------------|-------------------------------------------------------------------------------------------------------------------------------------------|
| Empirical formula                                  | C <sub>6</sub> H <sub>6</sub> IO <sub>2</sub> PbS <sub>2</sub>                                                                            |
| Formula weight                                     | 508.32                                                                                                                                    |
| Temperature (K)                                    | 300 K                                                                                                                                     |
| Crystal system                                     | orthorhombic                                                                                                                              |
| Space group                                        | <i>Pnma</i>                                                                                                                               |
| Unit cell dimensions                               | <i>a</i> (Å)=8.5418(7)<br><i>b</i> (Å)=22.790(2)<br><i>c</i> (Å)= 10.2937(10)<br><i>α</i> (°)= 90<br><i>β</i> (°)= 90<br><i>γ</i> (°)= 90 |
| <i>V</i> (Å <sup>3</sup> ), <i>Z</i>               | 2003.9(3), 8                                                                                                                              |
| Density (calculated) (g cm <sup>-3</sup> )         | 3.370                                                                                                                                     |
| <i>F</i> (000)                                     | 1800.0                                                                                                                                    |
| Goodness-of-fit on <i>F</i> <sup>2</sup>           | 1.042                                                                                                                                     |
| Final <i>R</i> indexes [ <i>I</i> ≥2σ( <i>I</i> )] | <i>R</i> <sub>1</sub> = 0.0271, <i>wR</i> <sub>2</sub> = 0.0648                                                                           |
| Final <i>R</i> indexes [all data]                  | <i>R</i> <sub>1</sub> = 0.0303, <i>wR</i> <sub>2</sub> = 0.0667                                                                           |

---

$$R_1 = \sum(|F_0| - |F_c|) / \sum|F_0|; \quad {}^b wR_2 = (\sum w(F_0^2 - F_c^2)^2 / \sum w(F_0^2)^2)^{1/2}$$

**Table S2.** Summary of luminescent lifetimes for **XCP-1**.

| Temperature [K] | $\lambda_{\text{ex}}$ [nm] | $\lambda_{\text{em}}$ [nm] | $\tau_{\text{av}}$ [ $\mu\text{s}$ ] |
|-----------------|----------------------------|----------------------------|--------------------------------------|
| 300             | 450                        | 527                        | 2.79                                 |
| 78              | 450                        | 527                        | 3.58                                 |
| 300             | 450                        | 654                        | 85.66                                |
| 200             | 450                        | 654                        | 153.4                                |
| 78              | 450                        | 654                        | 172.8                                |
| 300             | 510                        | 654                        | 71.2                                 |
| 200             | 510                        | 654                        | 87.75                                |
| 78              | 510                        | 654                        | 54.33                                |

**Table S3.** Summary of photophysical properties for **XCP-1** at 300 and 77 K.

| Temperature [K] | $\lambda_{\text{em}}$ [nm] | Stokes Shift [nm (eV)] | FWHM [nm] |
|-----------------|----------------------------|------------------------|-----------|
| 300             | 527 <sup>[a]</sup>         | 77 (0.40)              | 116       |
| 78              | 527 <sup>[a]</sup>         | 77                     | 72        |
| 300             | 654 <sup>[a]</sup>         | 204 (0.86)             | 73        |
| 78              | 654 <sup>[a]</sup>         | 204                    | 58        |
| 300             | 575 <sup>[b]</sup>         | 125 (0.27)             | 125       |
| 78              | 575 <sup>[b]</sup>         | 125                    | 70        |
| 300             | 654 <sup>[b]</sup>         | 204 (0.54)             | 80        |
| 78              | 654 <sup>[b]</sup>         | 204                    | 83        |

[a] and [b] represents the excitation wavelength is 450 and 510 nm, respectively.

## References

1. Kuhne, T. D. et al. CP2K: An electronic structure and molecular dynamics software package - Quickstep: Efficient and accurate electronic structure calculations. *J. Chem. Phys.* **152**, 194103 (2020).
2. VandeVondele, J. et al. Quickstep: Fast and accurate density functional calculations using a mixed Gaussian and plane waves approach. *Comput. Phys. Commun.* **167**, 103-128 (2005).
3. Krack, M. Pseudopotentials for H to Kr optimized for gradient-corrected exchange-correlation functionals. *Theor. Chem. Acc.* **114**, 145-152 (2005).
4. VandeVondele, J. & Hutter, J. Gaussian basis sets for accurate calculations on molecular systems in gas and condensed phases. *J. Chem. Phys.* **127** (2007).
5. Lippert, B. G., Parrinello, J. H. & Michele. A hybrid Gaussian and plane wave density functional scheme. *Mol. Phys.* **92**, 477-488 (2010).
6. Hartwigsen, C., Goedecker, S. & Hutter, J. Relativistic separable dual-space Gaussian pseudopotentials from H to Rn. *Phys. Rev. B* **58**, 3641-3662 (1998).
7. Perdew, J. P., Burke, K. & Ernzerhof, M. Generalized Gradient Approximation Made Simple. *Phys. Rev. Lett.* **77**, 3865-3868 (1996).
8. Hinuma, Y., Pizzi, G., Kumagai, Y., Oba, F. & Tanaka, I. Band structure diagram paths based on crystallography. *Comput. Mater. Sci.* **128**, 140-184 (2017).
9. Risthaus, T., Hansen, A. & Grimme, S. Excited states using the simplified Tamm–Dancoff-Approach for range-separated hybrid density functionals: development and application. *Phys. Chem. Chem. Phys.* **16**, 14408-14419 (2014).
10. Hehn, A.-S. et al. Excited-State Properties for Extended Systems: Efficient Hybrid Density Functional Methods. *J. Chem. Theory Comput.* **18**, 4186-4202 (2022).
11. VandeVondele, J. & Hutter, J. An efficient orbital transformation method for electronic structure calculations. *J. Chem. Phys.* **118**, 4365-4369 (2003).
12. Lu, T. & Chen, F. Multiwfn: a multifunctional wavefunction analyzer. *J. Comput. Chem.* **33**, 580-592 (2012).
13. Momma, K. & Izumi, F. VESTA 3 for three-dimensional visualization of crystal, volumetric and morphology data. *J. Appl. Crystallogr.* **44**, 1272-1276 (2011).
